# Supplementary material for: Single-step manufacturing of hierarchical dielectric metalens in the visible
Source: PubMed Central journal article supplement (PMC7211027; doi:10.1038/s41467-020-16136-5), 2020-05-08
Supplement: 41467_2020_16136_MOESM1_ESM.pdf [file 41467_2020_16136_MOESM1_ESM.pdf]

# Supplementary Information

## Single-step manufacturing of hierarchical dielectric metalens in the visible

Gwanho Yoon,<sup>1†</sup> Kwan Kim,<sup>2†</sup> Daihong Huh,<sup>2</sup> Heon Lee<sup>2\*</sup> and Junsuk Rho<sup>1,3,4\*</sup>

<sup>1</sup>*Department of Mechanical Engineering, Pohang University of Science and Technology (POSTECH), Pohang 37673, Republic of Korea*

<sup>2</sup>*Department of Materials Science and Engineering, Korea University, Seoul 02841, Republic of Korea*

<sup>3</sup>*Department of Chemical Engineering, Pohang University of Science and Technology (POSTECH), Pohang 37673, Republic of Korea*

<sup>4</sup>*National Institute of Nanomaterials Technology (NINT), Pohang 37673, Republic of Korea*

\*E-mail: [jsrho@postech.ac.kr](mailto:jsrho@postech.ac.kr) (J.R.); [heonlee@korea.ac.kr](mailto:heonlee@korea.ac.kr) (H.L.)

## Supplementary Figure 1

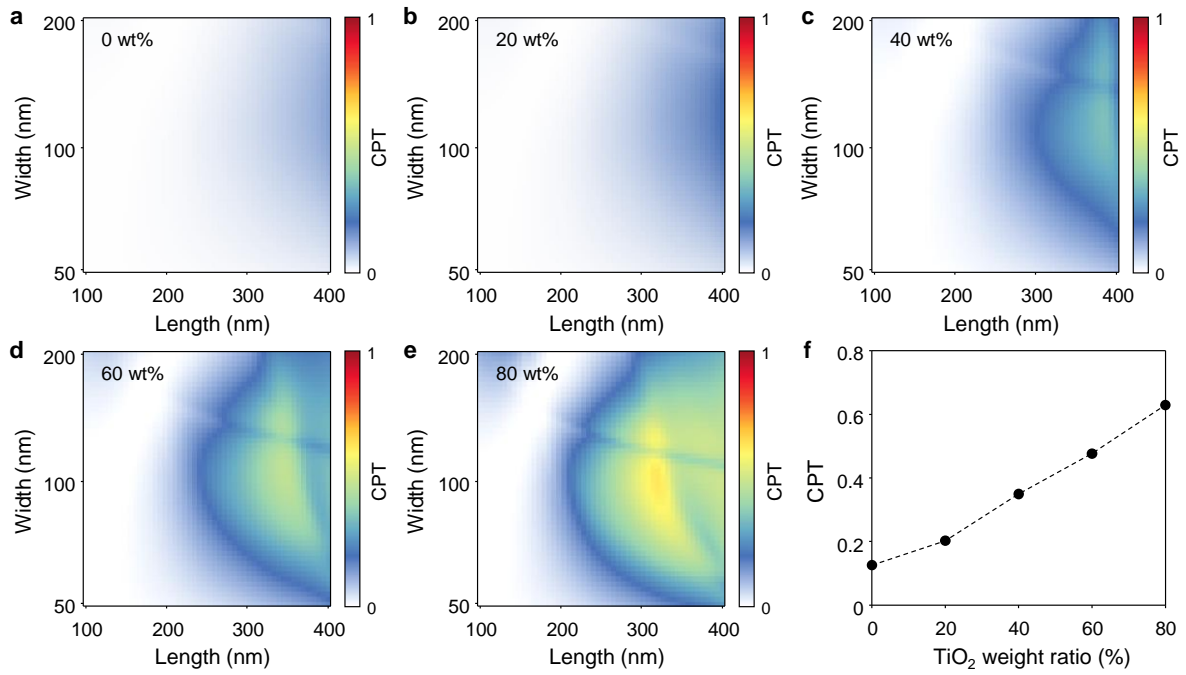

**Figure 1.** The effect of titanium dioxide (TiO<sub>2</sub>) weight ratio on the metalens efficiency at the wavelength of 532 nm. **a-e** Calculated cross-polarization transmittance (CPT) of rectangular nanostructures using measured refractive indices of the nanoparticle composite. Height: 720 nm; pitch: 450 nm. The length varies from 100 nm to 400 nm while the width varies from 50 nm to 200 nm. **f** The maximum CPT variation according to the TiO<sub>2</sub> weight ratio. The dashed line is to guide the eye.

## Supplementary Table 1

**Table 1. Comparison of our method with typical nanoimprint lithography in the fabrication of dielectric metasurfaces**

|                                         | Nanoimprint lithography (TiO <sub>2</sub> or GaN)                                                                                                                                                                                                                                          | This work                                                                                                                    |
|-----------------------------------------|--------------------------------------------------------------------------------------------------------------------------------------------------------------------------------------------------------------------------------------------------------------------------------------------|------------------------------------------------------------------------------------------------------------------------------|
| <b>Thin-film deposition</b>             | Necessary                                                                                                                                                                                                                                                                                  | Unnecessary                                                                                                                  |
| <b>Thin-film etching</b>                | Necessary                                                                                                                                                                                                                                                                                  | Unnecessary                                                                                                                  |
| <b>Patterning on flexible substrate</b> | Not easy due to thermal damages from thin film deposition or etching steps                                                                                                                                                                                                                 | Possible                                                                                                                     |
| <b>Optical properties</b>               | Controllable but very limited                                                                                                                                                                                                                                                              | Widely controllable by the content of nanoparticles                                                                          |
| <b>General replication procedure</b>    | <ol style="list-style-type: none"> <li>1. Thin-film deposition on a substrate</li> <li>2. Dropping the resist on the film</li> <li>3. UV-NIL with a printing mold</li> <li>4. Residue layer removal</li> <li>5. Dry etching of the thin film</li> <li>6. Resist residue removal</li> </ol> | <ol style="list-style-type: none"> <li>1. Dropping the NPC on a substrate</li> <li>2. UV-NIL with a printing mold</li> </ol> |

TiO<sub>2</sub>: titanium dioxide; GaN: gallium nitride; NPC: nanoparticle composite; NIL: nanoimprint lithography.

## Supplementary Figure 2

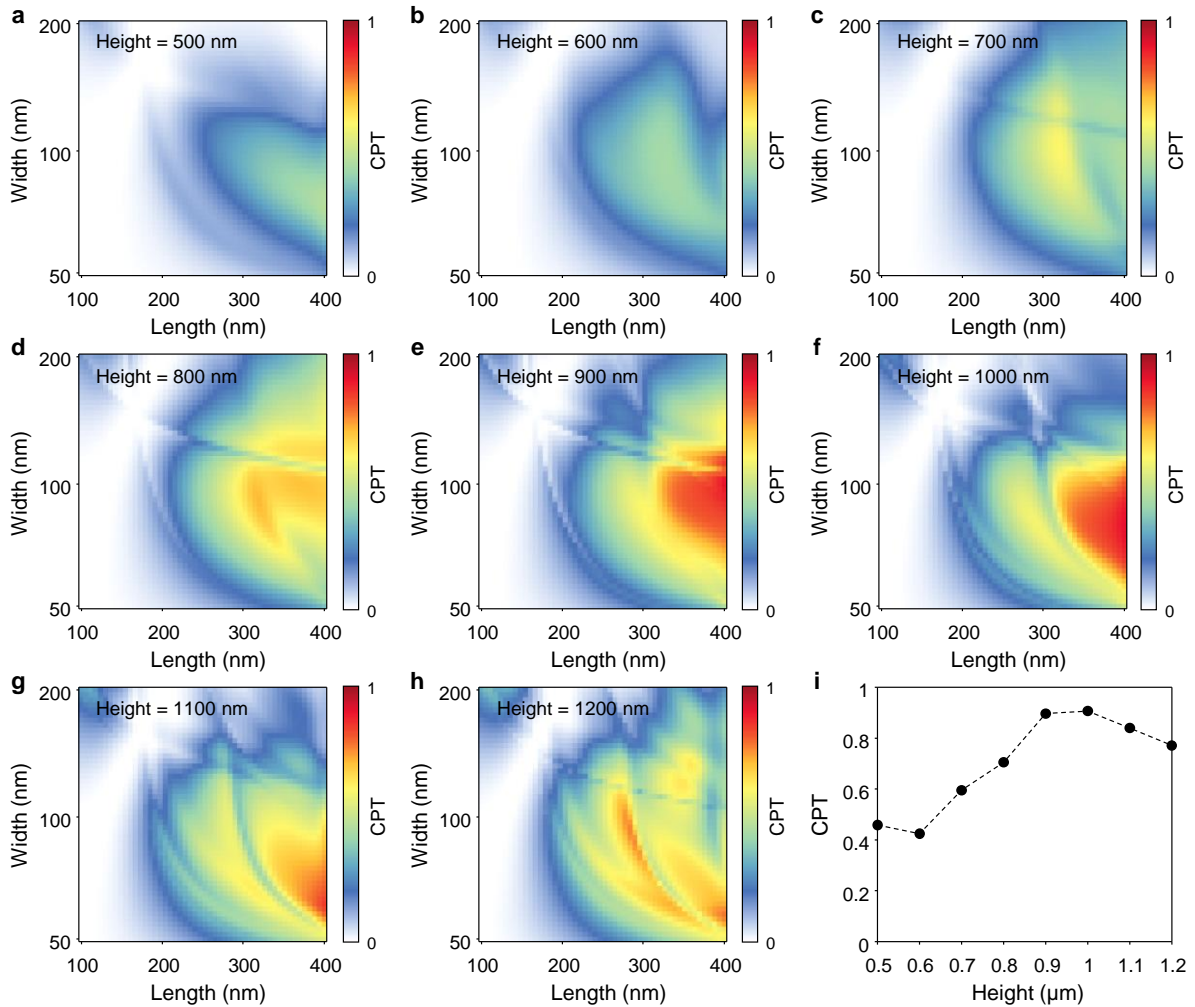

**Figure 2.** The effect of the structure height on the metalens efficiency at the wavelength of 532 nm. **a-h** Calculated cross-polarization transmittance (CPT) of rectangular nanostructures based on the nanoparticle composite. Pitch: 450 nm. The length varies from 100 nm to 400 nm while the width varies from 50 nm to 200 nm. **i** The maximum CPT variation according to the structure height. The dashed line is to guide the eye.
